# Supplementary figures and images for: Intramolecular competition in the photodissociation of C3D3 radicals at 248 and 193 nm
Source: Royal Society of Chemistry journal article supplement (doi:10.1039/c0cp00380h), 2010-01-01

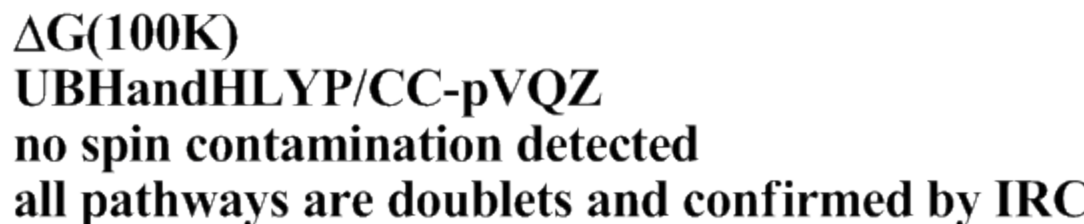

Supplement: c0cp00380h.pdf [file c0cp00380h.pdf]
